# Supplementary material for: Production of Blended Poly(acrylonitrile): Poly(ethylenedioxythiophene):Poly(styrene sulfonate) Electrospun Fibers for Neural Applications
Source: MDPI journal article supplement (doi:10.3390/polym15132760), 2023-06-21
Supplement: s1 [file s1]

# Supplementary Information

## Production of Blended Poly(acrylonitrile): Poly(ethylenedioxythiophene):Poly(styrene sulfonate) Electrospun Fibers for Neural Applications

Fábio F. F. Garrudo <sup>1,2,3,4,\*</sup>, Giulia Filippone <sup>2,3</sup>, Leonor Resina <sup>2,3,4,5</sup>, João C. Silva <sup>2,3,4</sup>, Frederico Barbosa <sup>2,3,4</sup>, Luís F. V. Ferreira <sup>3,4,6</sup>, Teresa Esteves <sup>3,4</sup>, Ana Clara Marques <sup>6,7</sup>, Jorge Morgado <sup>1,2,\*</sup> and Frederico Castelo Ferreira <sup>2,3,4,\*</sup>

- <sup>1</sup> Instituto de Telecomunicações, Instituto Superior Técnico, Universidade de Lisboa, Avenida Rovisco Pais, 1049-001 Lisboa, Portugal
  - <sup>2</sup> Department of Bioengineering, Instituto Superior Técnico, Universidade de Lisboa, Avenida Rovisco Pais, 1049-001 Lisboa, Portugal; joao.f.da.silva@tecnico.ulisboa.pt (J.C.S.)
  - <sup>3</sup> iBB—Institute for Bioengineering and Biosciences, Instituto Superior Técnico, Universidade de Lisboa, Avenida Rovisco Pais, 1049-001 Lisboa, Portugal
  - <sup>4</sup> Associate Laboratory i4HB—Institute for Health and Bioeconomy, Avenida Rovisco Pais, 1049-001 Lisboa, Portugal
  - <sup>5</sup> Departament d'Enginyeria Química and Barcelona Research Center for Multiscale Science and Engineering, EEBE, Universitat Politècnica de Catalunya, 08019 Barcelona, Spain
  - <sup>6</sup> Department of Chemical Engineering, Instituto Superior Técnico, Universidade de Lisboa, Avenida Rovisco Pais, 1049-001 Lisboa, Portugal
  - <sup>7</sup> CERENA, DEQ, Instituto Superior Técnico, Universidade de Lisboa, Avenida Rovisco Pais, 1049-001 Lisboa, Portugal
- \* Correspondence: fabio.garrudo@tecnico.ulisboa.pt (F.F.F.G.); jmforgado@tecnico.ulisboa.pt (J.M.); frederico.ferreira@tecnico.ulisboa.pt (F.C.F.)

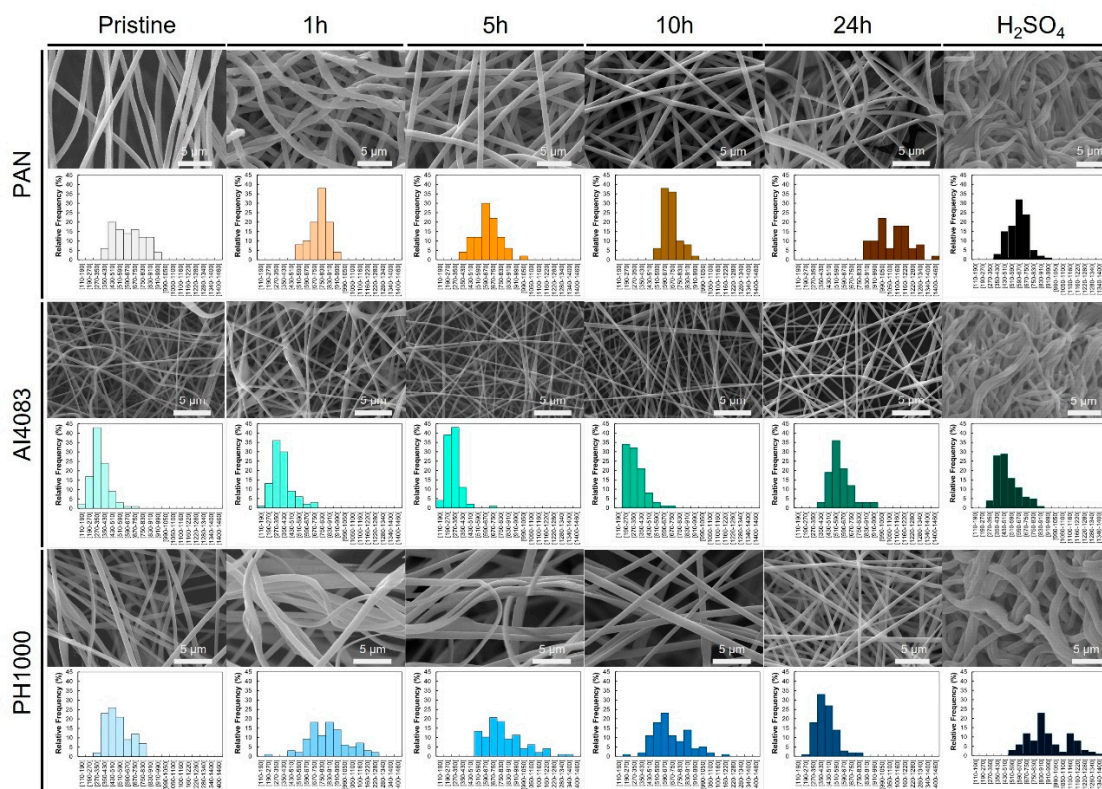

**Figure S1.** SEM images and respective size distribution histograms for all the fibers obtained in this study.

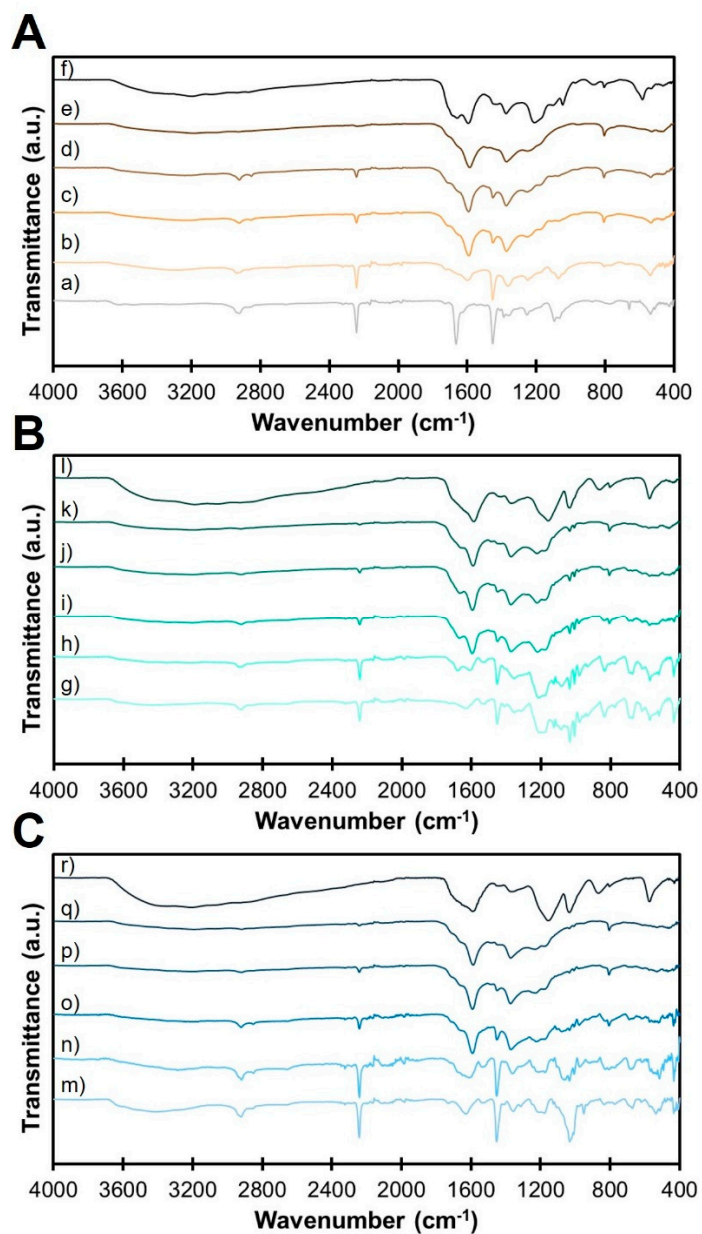

**Figure S2.** FTIR spectra of samples produced using (A) pristine PAN or PAN blended with (B) PEDOT:PSS AI4083 or (C) PEDOT:PSS PH1000. Sample code is a) PAN, b) PAN 1H, c) PAN 5H, d) PAN 10H, e) PAN 24H, f) PAN  $\text{H}_2\text{SO}_4$ , g) AI4083, h) AI4083 1H, i) AI4083 5H, j) AI4083 10H, k) AI4083 24H, l) AI4083  $\text{H}_2\text{SO}_4$ , m) PH1000, n) PH1000 1H, o) PH1000 5H, p) PH1000 10H, q) PH1000 24H, and r) PH1000  $\text{H}_2\text{SO}_4$ .

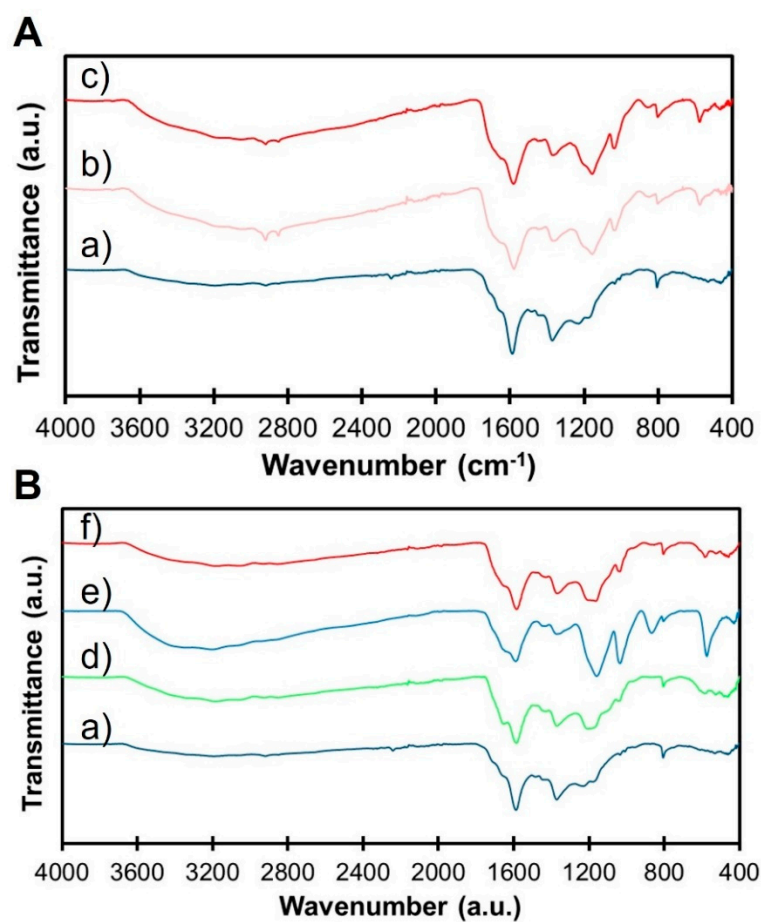

**Figure S3.** FTIR spectra of different PH1000 H<sub>2</sub>SO<sub>4</sub> samples at different stages of optimization. (A) Different incubation times in sulfuric acid at RT, a) zero hours, b) 1 hour, c) 24 hours. (B) Different temperature of the 30 min long incubation in sulfuric acid, d) 100°C, e) 130 °C, f) 150 °C.

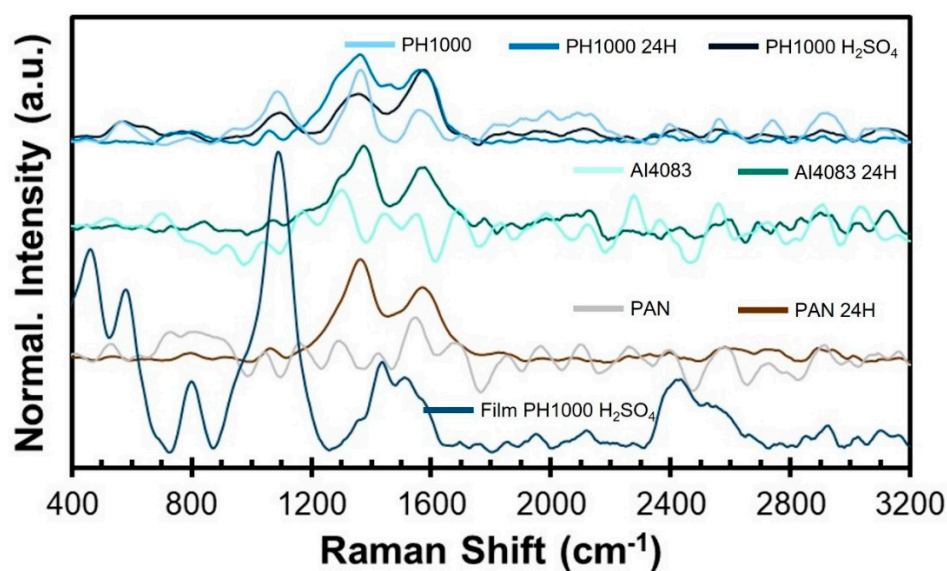

**Figure S4.** Raman spectra for the main electrospun samples obtained in this study.

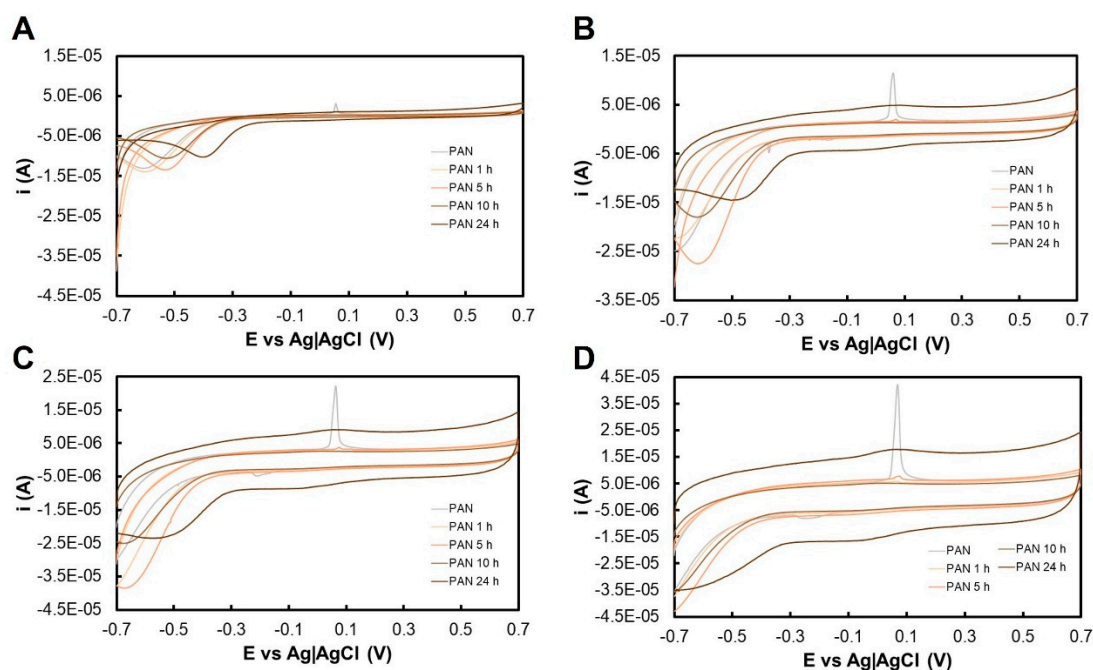

**Figure S5.** Cyclic voltammetry profiles of samples produced using pristine PAN. Different scanning speeds were tested: (A) 0.01 Vs, (B) 0.05 Vs, (C) 0.1 Vs, (D) 0.2 Vs.

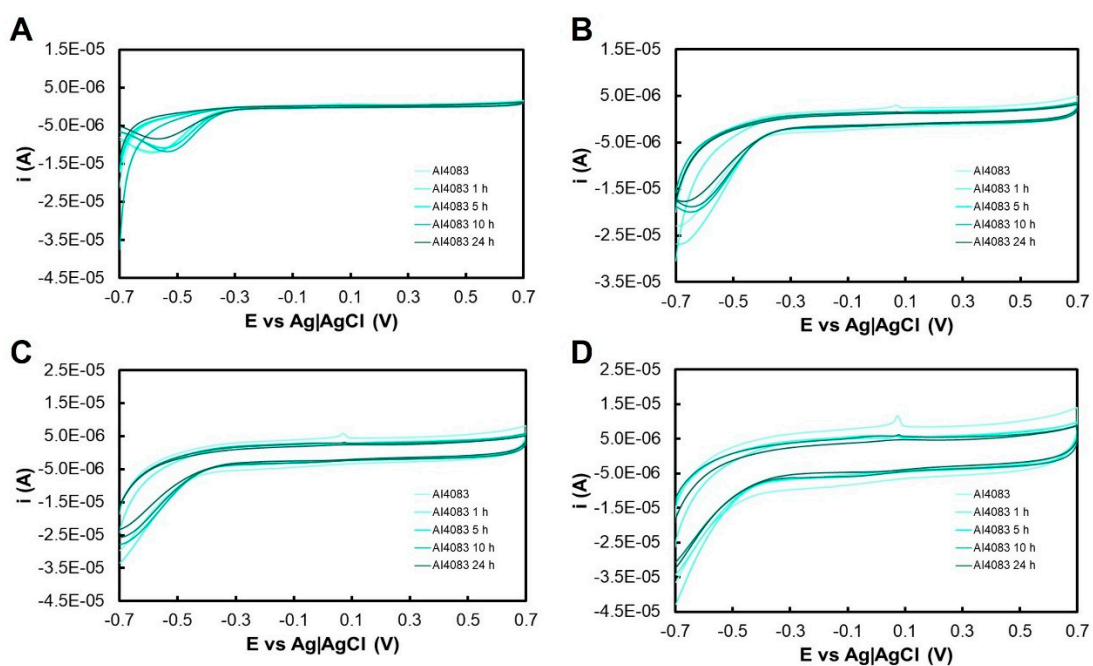

**Figure S6.** Cyclic voltammetry profiles of samples produced using PAN blended with PEDOT:PSS Clevios™ P VP AI 4083. Different scanning speeds were tested: (A) 0.01 Vs, (B) 0.05 Vs, (C) 0.1 Vs, (D) 0.2 Vs.



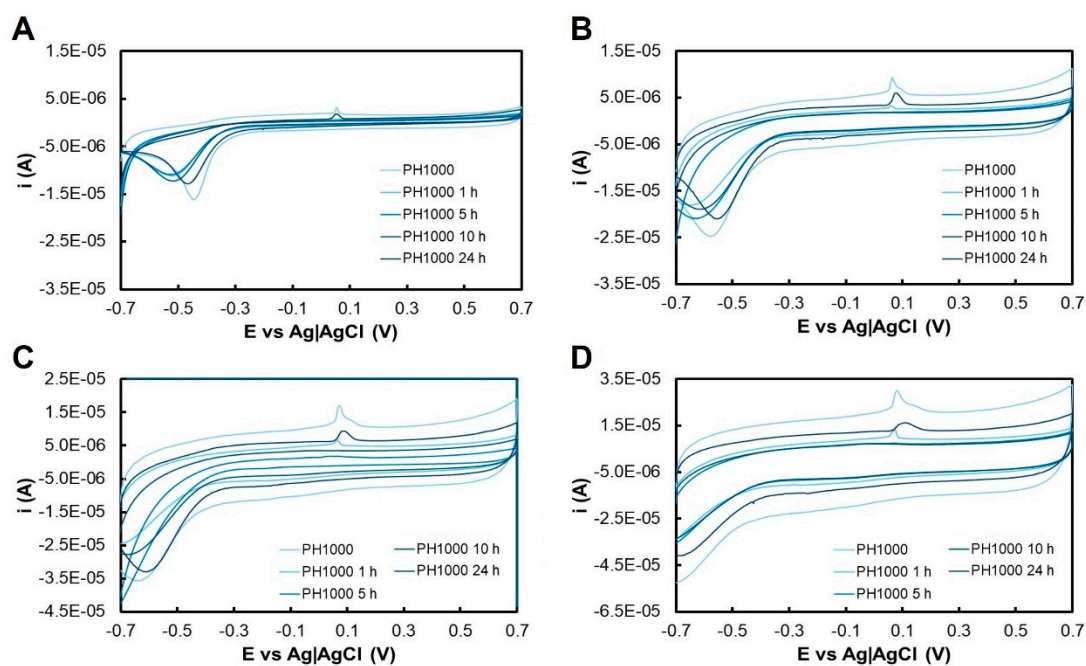

**Figure S7.** Cyclic voltammetry profiles of samples produced using PAN blended with PEDOT:PSS Clevios™ PH 1000. Different scanning speeds were tested: (A) 0.01 Vs, (B) 0.05 Vs, (C) 0.1 Vs, (D) 0.2 Vs.

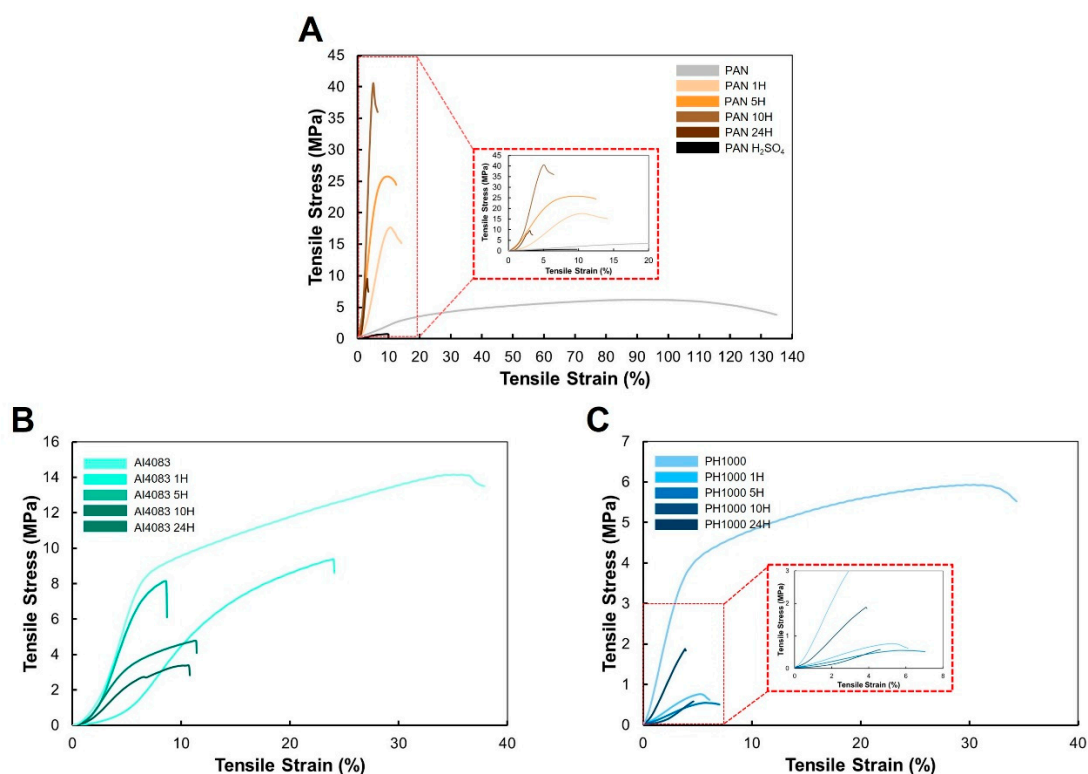

**Figure S8.** Examples of stress-strain curves for all samples obtained from (A) pristine PAN and blended with (B) PEDOT:PSS Clevios™ P VP AI 4083 or (C) PEDOT:PSS Clevios™ PH 1000.

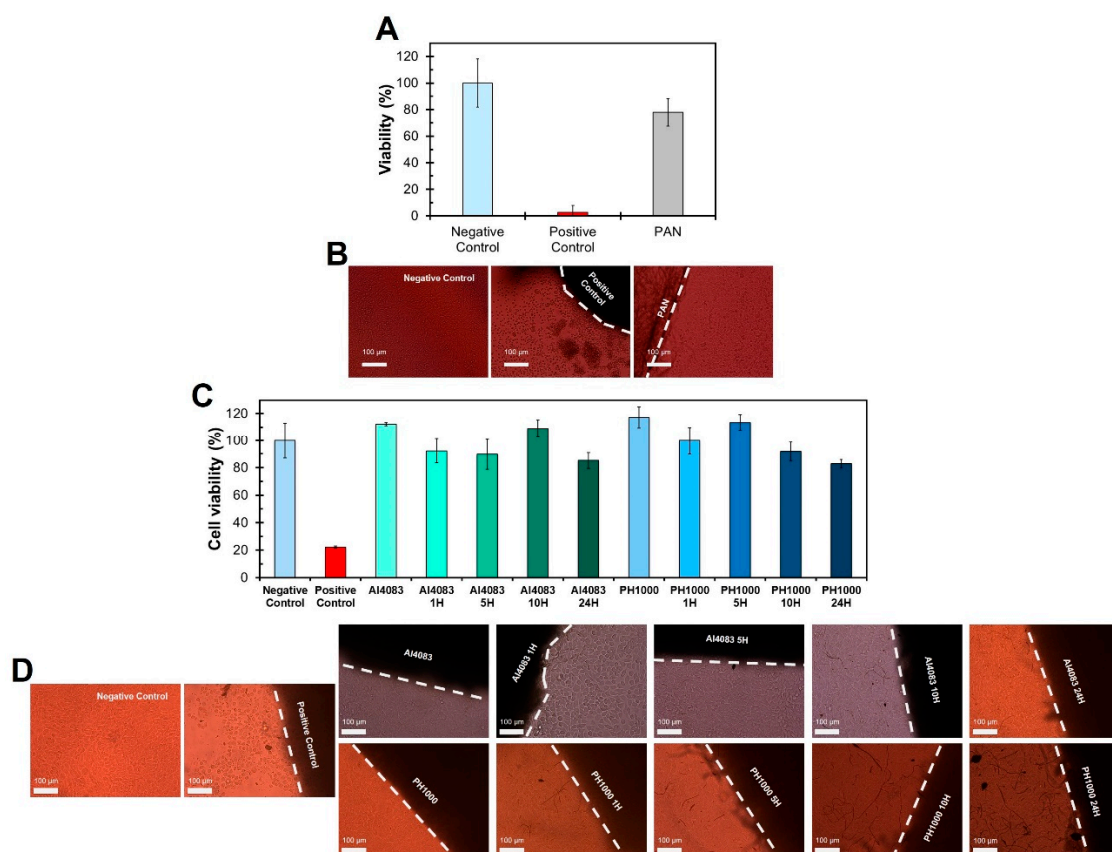

**Figure S9.** Summary of fiber biocompatibility evaluation following the ISO10993 guidelines for pristine PAN fibers, including (A) MTT after 48h of cell incubation with the lixiviates (mean  $\pm$  std,  $n = 3$ ) and (B) microscopy images depicting the direct contact results (48h); and for all the PAN/PEDOT samples obtained in this study, including (C) MTT after 48h of cell incubation with the lixiviates (mean  $\pm$  std,  $n = 3$ ) and (D) microscopy images depicting the direct contact results (48h).

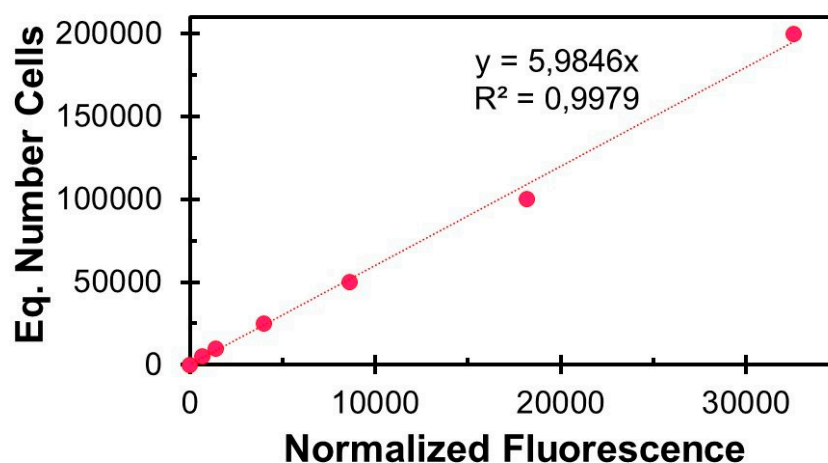

**Figure S10.** Alamar Blue® calibration curve for ReNCell-VM and used to calculate the equivalent number of cells in the proliferation assay.

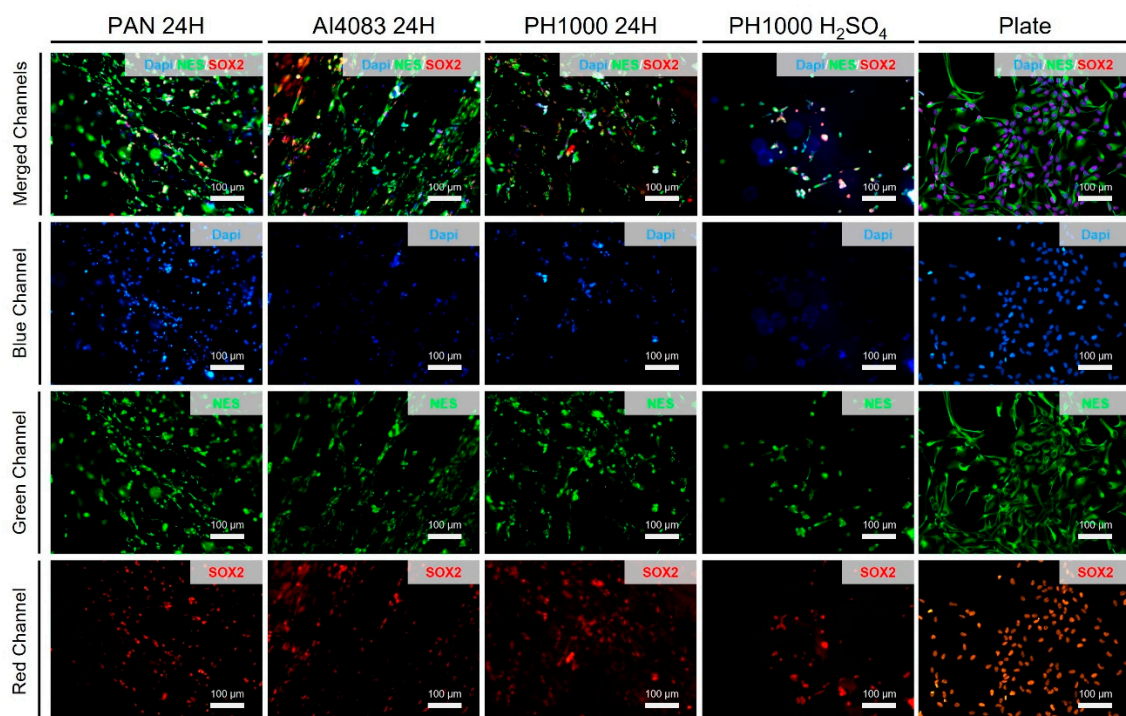

**Figure S11.** Immunostaining (split channels and respective merge) of ReNCell-VM after proliferating for 7 days on different samples: SOX2 (red - stem cell marker), NES (green - neural stem cell marker) and Dapi counter-stain (blue – Nucleus).

**Table S1.** Summary of the sample code and respective average fiber diameter ( $n = 50-100$ ) of all the samples obtained in this study. (\*) means  $p < 0.05$  when compared with PAN. (+) means  $p < 0.05$  when compared with PAN 1H. (a) means  $p < 0.05$  when compared with PAN 5H. (b) means  $p < 0.05$  when compared with PAN 10H. (c) means  $p < 0.05$  when compared with PAN 24H. (d) means  $p < 0.05$  when compared with PAN  $H_2SO_4$ . (e) means  $p < 0.05$  when compared with AI4083. (f) means  $p < 0.05$  when compared with AI4083 1H. (g) means  $p < 0.05$  when compared with AI4083 5H. (h) means  $p < 0.05$  when compared with AI4083 10H. (i) means  $p < 0.05$  when compared with AI4083 24H. (j) means  $p < 0.05$  when compared with AI4083  $H_2SO_4$ . (k) means  $p < 0.05$  when compared with PH1000. (l) means  $p < 0.05$  when compared with PH1000 1H. (m) means  $p < 0.05$  when compared with PH1000 5H. (n) means  $p < 0.05$  when compared with PH1000 10H. (o) means  $p < 0.05$  when compared with PH1000 24H.

| Sample description               | Sample code      | Fiber Diameter (nm)                             |
|----------------------------------|------------------|-------------------------------------------------|
| PAN pristine                     | PAN              | $640 \pm 159$                                   |
| PAN 1h                           | PAN 1H           | $759 \pm 98^{(*)}$                              |
| PAN 5h                           | PAN 5H           | $654 \pm 135^{(+)}$                             |
| PAN 10h                          | PAN 10H          | $703 \pm 85$                                    |
| PAN 24h                          | PAN 24H          | $1100 \pm 135^{(*)+(a)(b)}$                     |
| PAN 24h + $H_2SO_4$              | PAN $H_2SO_4$    | $612 \pm 107^{(*)+(b)(c)}$                      |
| PAN/PEDOT AI4083 pristine        | AI4083           | $356 \pm 104^{(*)+(a)(b)(c)(d)}$                |
| PAN/PEDOT AI4083 1h              | AI4083 1H        | $380 \pm 108^{(*)+(a)(b)(c)(d)}$                |
| PAN/PEDOT AI4083 5h              | AI4083 5H        | $288 \pm 54^{(*)+(a)(b)(c)(d)(e)(f)}$           |
| PAN/PEDOT AI4083 10h             | AI4083 10H       | $321 \pm 95^{(*)+(a)(b)(c)(d)}$                 |
| PAN/PEDOT AI4083 24h             | AI4083 24H       | $592 \pm 117^{(*)+(b)(c)(d)(e)(f)(g)(h)}$       |
| PAN/PEDOT AI4083 24h + $H_2SO_4$ | AI4083 $H_2SO_4$ | $507 \pm 125^{(*)+(a)(b)(c)(d)(e)(f)(g)(h)(i)}$ |
| PAN/PEDOT PH1000 pristine        | PH1000           | $515 \pm 120^{(*)+(a)(b)(c)(d)(e)(f)(g)(h)}$    |

|                                                          |                                       |                                                                   |
|----------------------------------------------------------|---------------------------------------|-------------------------------------------------------------------|
| PAN/PEDOT PH1000 1h                                      | PH1000 1H                             | $873 \pm 179^{(*)}(+)(a)(b)(c)(d)(e)(f)(g)(h)(i)(j)(k)}$          |
| PAN/PEDOT PH1000 5h                                      | PH1000 5H                             | $852 \pm 210^{(*)}(a)(b)(c)(d)(e)(f)(g)(h)(i)(j)(k)}$             |
| PAN/PEDOT PH1000 10h                                     | PH1000 10H                            | $685 \pm 171^{(a)(c)(d)(e)(f)(g)(h)(i)(j)(k)(l)(m)}$              |
| PAN/PEDOT PH1000 24h                                     | PH1000 24H                            | $437 \pm 109^{(*)}(+)(a)(b)(c)(d)(e)(f)(g)(h)(i)(j)(k)(l)(m)(n)}$ |
| PAN/PEDOT PH1000 24h +<br>H <sub>2</sub> SO <sub>4</sub> | PH1000 H <sub>2</sub> SO <sub>4</sub> | $940 \pm 210^{(*)}(+)(a)(b)(c)(d)(e)(g)(h)(i)(j)(k)(m)(n)(o)}$    |
